# Supplementary material for: Roseburia intestinalis generated butyrate boosts anti-PD-1 efficacy in colorectal cancer by activating cytotoxic CD8+ T cells
Source: PubMed Central journal article supplement — Gut. 2023 Jul 25;72(11):2112–22. doi: 10.1136/gutjnl-2023-330291 (PMC10579466; doi:10.1136/gutjnl-2023-330291), 2023-07-25
Supplement: gutjnl-2023-330291supp004.pdf [file gutjnl-2023-330291supp004.pdf]

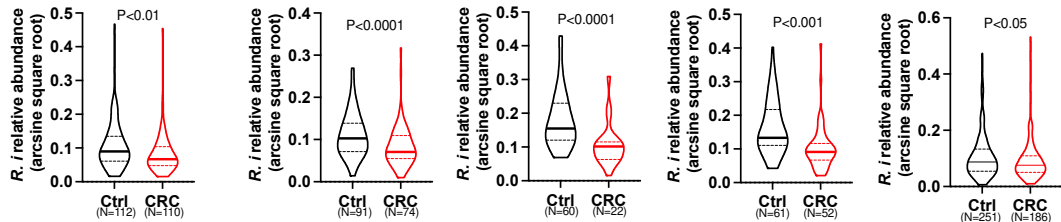

**Supplementary Figure 2.** *R. intestinalis* is depleted in fecal samples of CRC patients. Arcsine square root transferred relative abundance of *R. intestinalis* in in-house metagenomic cohort (A) and published metagenomic cohorts (B) of colorectal cancer patients and healthy controls. CHN, China; DE, Germany; FR, France; JP, Japan.
