# Supplementary material for: Roseburia intestinalis generated butyrate boosts anti-PD-1 efficacy in colorectal cancer by activating cytotoxic CD8 + T cells
Source: HighWire-hosted journal article supplement (doi:10.1136/gutjnl-2023-330291), 2023-07-25
Supplement: gutjnl-2023-330291supp006_data_supplement.pdf [file gutjnl-2023-330291supp006_data_supplement.pdf]

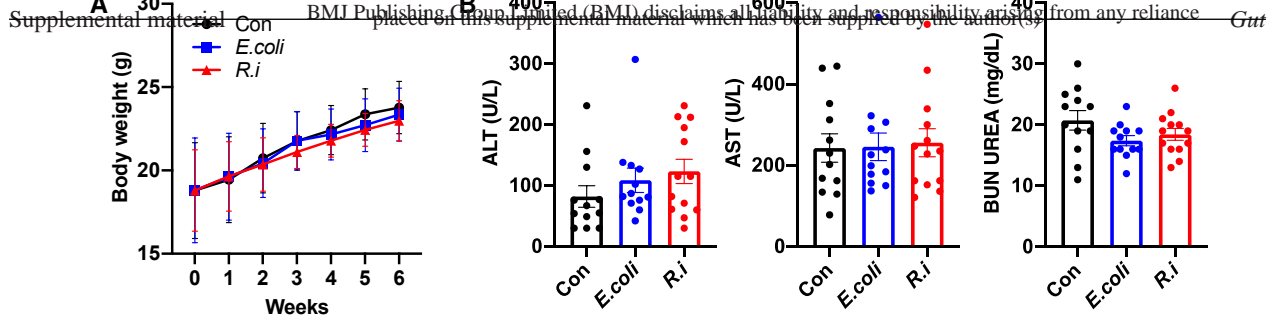

**Supplementary Figure 4.** Safety assessment of *R. intestinalis* on *APC<sup>Min/+</sup>* mice. The dosage and frequency of *R. intestinalis* treatment on mouse body weight (A), liver (ALT, AST) and renal function (BUN) (B). ALT, Alanine transaminase; AST, aspartate aminotransferase; BUN, blood urea nitrogen; CREA, creatinine, all the samples were under 0.3mg/dL and the results were not shown.
