# Supplementary material for: Roseburia intestinalis generated butyrate boosts anti-PD-1 efficacy in colorectal cancer by activating cytotoxic CD8+ T cells
Source: PubMed Central journal article supplement — Gut. 2023 Jul 25;72(11):2112–22. doi: 10.1136/gutjnl-2023-330291 (PMC10579466; doi:10.1136/gutjnl-2023-330291), 2023-07-25
Supplement: gutjnl-2023-330291supp007.pdf [file gutjnl-2023-330291supp007.pdf]

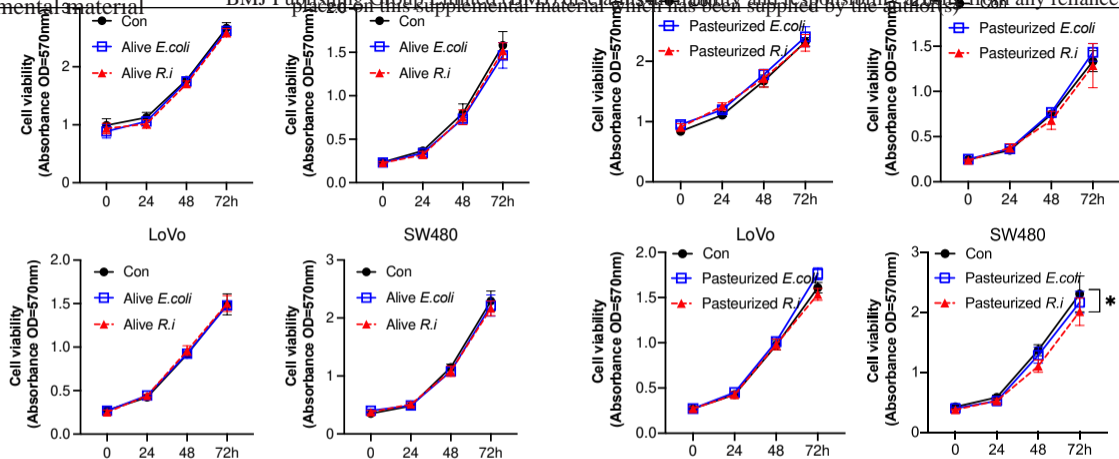

**Supplementary Figure 5.** Alive and pasteurized *R. intestinalis* have no tumor-suppressive effects in vitro. (A) Both alive *R. i* (CFU=10<sup>6</sup>/ml) and (B) pasteurized (70 ° C, 30min) *R. i* had no effects on colonic cell viability.
