# Supplementary material for: Roseburia intestinalis generated butyrate boosts anti-PD-1 efficacy in colorectal cancer by activating cytotoxic CD8+ T cells
Source: PubMed Central journal article supplement — Gut. 2023 Jul 25;72(11):2112–22. doi: 10.1136/gutjnl-2023-330291 (PMC10579466; doi:10.1136/gutjnl-2023-330291), 2023-07-25
Supplement: gutjnl-2023-330291supp008.pdf [file gutjnl-2023-330291supp008.pdf]

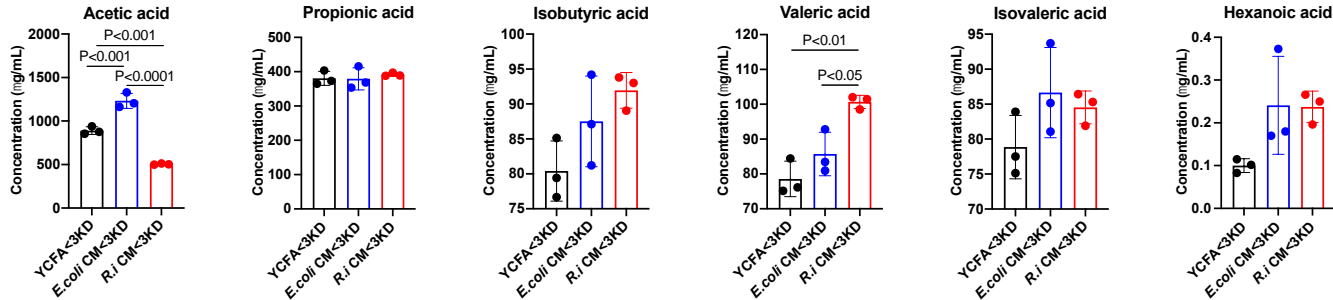

**Supplementary Figure 6.** The concentration ( $\mu\text{g/ml}$ ) of other short-chain fatty acids besides butyric acid (acetic acid, propionic acid, butyric acid, isobutyric acid, valeric acid, isovaleric acid and hexanoic acid) in *R.i* CM <3KD was determined by targeted short-chain fatty acid GC-MS analysis.
