# Supplementary material for: Roseburia intestinalis generated butyrate boosts anti-PD-1 efficacy in colorectal cancer by activating cytotoxic CD8+ T cells
Source: PubMed Central journal article supplement — Gut. 2023 Jul 25;72(11):2112–22. doi: 10.1136/gutjnl-2023-330291 (PMC10579466; doi:10.1136/gutjnl-2023-330291), 2023-07-25
Supplement: gutjnl-2023-330291supp009.pdf [file gutjnl-2023-330291supp009.pdf]

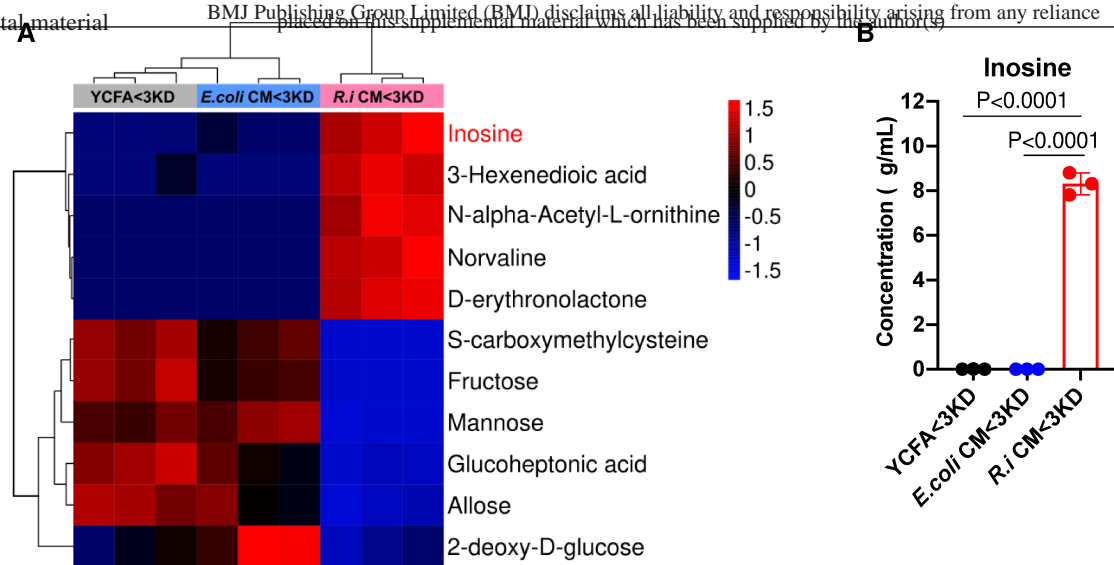

**Supplementary Figure 7.** Inosine might be another tumor suppressive component produced by *R.i.* (A) The *R.i* CM <3KD fraction was assessed by untargeted GC-MS/MS analysis and inosine was identified as the candidate tumor suppressive molecule. (B) Inosine concentration ( $\mu\text{g/ml}$ ) in *R.i* CM <3KD was determined by targeted LC-MS analysis.
