# Supplementary material for: Roseburia intestinalis generated butyrate boosts anti-PD-1 efficacy in colorectal cancer by activating cytotoxic CD8+ T cells
Source: PubMed Central journal article supplement — Gut. 2023 Jul 25;72(11):2112–22. doi: 10.1136/gutjnl-2023-330291 (PMC10579466; doi:10.1136/gutjnl-2023-330291), 2023-07-25
Supplement: gutjnl-2023-330291supp011.pdf [file gutjnl-2023-330291supp011.pdf]

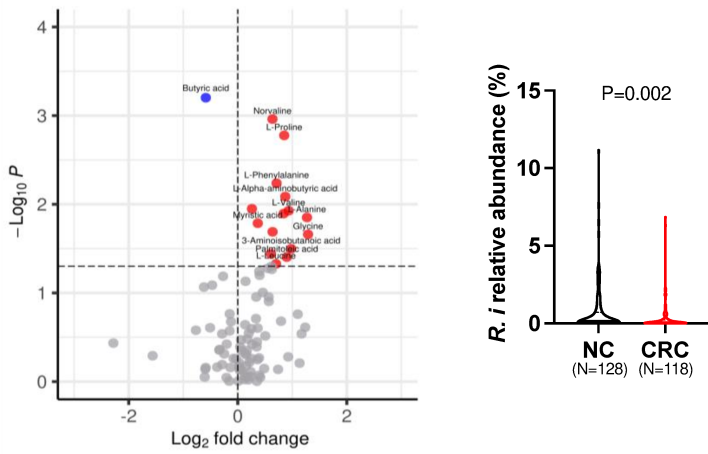

**Supplementary Figure 9.** *R. intestinalis* and butyric acid are depleted in fecal samples of CRC patients. Volcano plots of significantly altered human fecal metabolites between CRC and NC (A). Enriched metabolites are labelled as red dots and depleted ones are labelled as blue.  $-\text{Log}_{10} P$  (0.05) was indicated with the horizontal dash line. CRC, colorectal cancer; NC, normal control. (B) Relative abundance of *R. intestinalis* (%) in fecal samples used for metabolomic sequencing in (A).
