# Supplementary material for: Roseburia intestinalis generated butyrate boosts anti-PD-1 efficacy in colorectal cancer by activating cytotoxic CD8+ T cells
Source: PubMed Central journal article supplement — Gut. 2023 Jul 25;72(11):2112–22. doi: 10.1136/gutjnl-2023-330291 (PMC10579466; doi:10.1136/gutjnl-2023-330291), 2023-07-25
Supplement: gutjnl-2023-330291supp012.pdf [file gutjnl-2023-330291supp012.pdf]

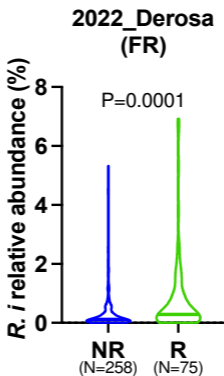

**Supplementary Figure 10.** Relative abundance of *R. intestinalis* in a France cohort of responders and non-responders to immune checkpoint inhibitors. NR, non-responder; R, responder.
