# Supplementary material for: Roseburia intestinalis generated butyrate boosts anti-PD-1 efficacy in colorectal cancer by activating cytotoxic CD8+ T cells
Source: PubMed Central journal article supplement — Gut. 2023 Jul 25;72(11):2112–22. doi: 10.1136/gutjnl-2023-330291 (PMC10579466; doi:10.1136/gutjnl-2023-330291), 2023-07-25
Supplement: gutjnl-2023-330291supp013.pdf [file gutjnl-2023-330291supp013.pdf]

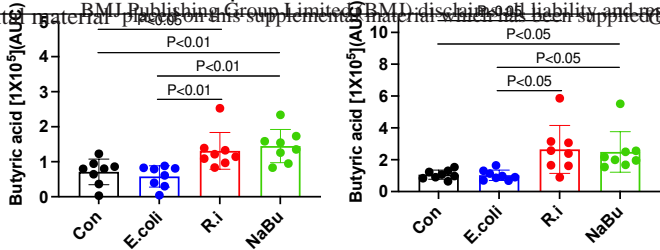

**Supplementary Figure 11.** The relative concentration of butyrate acid (area under curve, AUC) in MC38 and CT26 orthotopic mice feces.
