# Supplementary material for: Roseburia intestinalis generated butyrate boosts anti-PD-1 efficacy in colorectal cancer by activating cytotoxic CD8 + T cells
Source: HighWire-hosted journal article supplement (doi:10.1136/gutjnl-2023-330291), 2023-07-25
Supplement: gutjnl-2023-330291supp014_data_supplement.pdf [file gutjnl-2023-330291supp014_data_supplement.pdf]

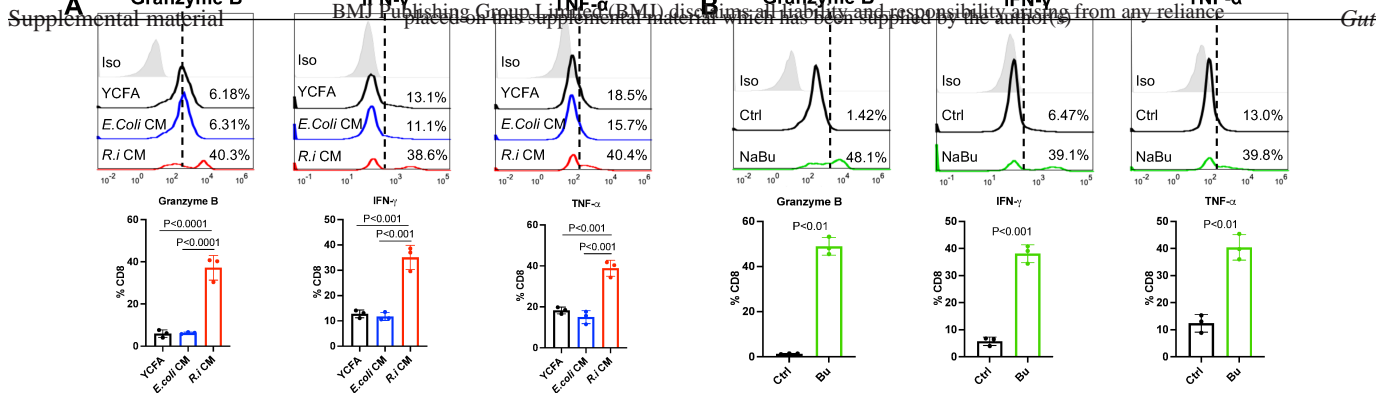

**Supplementary Figure 12.** Comparable dosage of butyrate in *R.i* CM suppresses colorectal cancer cells by CD8<sup>+</sup> T cell boosting in vitro. *R.i* CM (A) and comparable dosage (1mM) of butyrate (B) directly boosted Granzyme B<sup>+</sup>, IFN- $\gamma$ <sup>+</sup>, TNF- $\alpha$ <sup>+</sup> CD8<sup>+</sup> T cells isolated from C57BL/6 mouse spleen.
