# Supplementary material for: Roseburia intestinalis generated butyrate boosts anti-PD-1 efficacy in colorectal cancer by activating cytotoxic CD8+ T cells
Source: PubMed Central journal article supplement — Gut. 2023 Jul 25;72(11):2112–22. doi: 10.1136/gutjnl-2023-330291 (PMC10579466; doi:10.1136/gutjnl-2023-330291), 2023-07-25
Supplement: gutjnl-2023-330291supp016.pdf [file gutjnl-2023-330291supp016.pdf]

**S Table 1. Antibodies used in this study**

| ANTIBODIES                                                             | SOURCE                     | IDENTIFIER    | APPLICATION | DILUTION / CONCENTRATION |
|------------------------------------------------------------------------|----------------------------|---------------|-------------|--------------------------|
| Ki-67 (D3B5) Rabbit mAb (IHC Formulated)                               | Cell Signalling Technology | Cat# 12202    | IHC         | 1/200                    |
| Anti-ZO-1 tight junction protein antibody                              | abcam                      | Cat# ab96587  | IHC, WB     | 1/100, 1/500             |
| Claudin-3 polyclonal antibody                                          | Thermo Fisher Scientific   | Cat# 34-1700  | IHC, WB     | 1/100, 1/1000            |
| Recombinant Anti-CD8 alpha antibody [EPR21769]                         | abcam                      | Cat# ab217344 | IHC         | 1/2000                   |
| Caspase-3 (8G10) Rabbit mAb                                            | Cell Signalling Technology | Cat# 9665     | WB          | 1/1000                   |
| Cleaved Caspase-3 (Asp175) antibody                                    | Cell Signalling Technology | Cat# 9661     | WB          | 1/1000                   |
| Caspase-7 antibody                                                     | Cell Signalling Technology | Cat# 9492     | WB          | 1/1000                   |
| Cleaved Caspase-7 (Asp198) antibody                                    | Cell Signalling Technology | Cat# 9491     | WB          | 1/1000                   |
| Caspase-9 (C9) Mouse mAb                                               | Cell Signalling Technology | Cat# 9508     | WB          | 1/1000                   |
| PARP (46D11) Rabbit mAb                                                | Cell Signalling Technology | Cat# 9532     | WB          | 1/1000                   |
| Cleaved PARP (Asp214) Rabbit mAb                                       | Cell Signalling Technology | Cat# 5625     | WB          | 1/1000                   |
| Cdk6 (D4SS8) Rabbit mAb                                                | Cell Signalling Technology | Cat# 13331    | WB          | 1/1000                   |
| p27 Kip1 (D69C12) XP® Rabbit mAb                                       | Cell Signalling Technology | Cat# 3686     | WB          | 1/1000                   |
| Phospho-NF-κB p65 (Ser536) Rabbit mAb                                  | Cell Signalling Technology | Cat# 3033     | WB          | 1/1000                   |
| NF-κB p65 (D14E12) Rabbit mAb                                          | Cell Signalling Technology | Cat# 8242     | WB          | 1/1000                   |
| β-actin (13E5) Rabbit mAb                                              | Cell Signalling Technology | Cat# 4970     | WB          | 1/1000                   |
| Anti-rabbit IgG, HRP-linked Antibody                                   | Cell Signalling Technology | Cat# 7074     | WB          | 1/10000                  |
| Anti-mouse IgG, HRP-linked Antibody                                    | Cell Signalling Technology | Cat# 7076     | WB          | 1/10000                  |
| Ki-67 (8D5) Mouse mAb                                                  | Cell Signalling Technology | Cat# 9449     | IF          | 1/6400                   |
| Alexa Fluor 488 goat anti-mouse IgG secondary antibody                 | Thermo Fisher Scientific   | Cat# A-11001  | IF          | 1 µg/mL                  |
| Brilliant Violet 605 anti-human CD45 antibody (2D1)                    | BioLegend                  | Cat# 368524   | FCM         | 1/100                    |
| PE anti-human CD3 antibody (OKT3)                                      | BioLegend                  | Cat# 317308   | FCM         | 1/100                    |
| PE/Cyanine5 anti-human CD4 antibody (RPA-T4)                           | BioLegend                  | Cat# 300510   | FCM         | 1/100                    |
| Brilliant Violet 421 anti-human CD8a antibody (SK1)                    | BioLegend                  | Cat# 344748   | FCM         | 1/100                    |
| PE/Cyanine7 anti-human/mouse Granzyme B recombinant antibody (QA16A02) | BioLegend                  | Cat# 372214   | FCM         | 1/100                    |
| Brilliant Violet 711 anti-human IFN-γ antibody (4S.B3)                 | BioLegend                  | Cat# 502540   | FCM         | 1/100                    |
| FITC anti-human TNF-α antibody (Mab11)                                 | BioLegend                  | Cat# 502906   | FCM         | 1/100                    |
| Brilliant Violet 605 anti-mouse CD45 antibody (30-F11)                 | BioLegend                  | Cat# 103140   | FCM         | 1/100                    |
| PerCP/Cyanine5.5 anti-mouse/human CD11b antibody (M1/70)               | BioLegend                  | Cat# 101228   | FCM         | 1/100                    |
| PE anti-mouse Ly-6G/Ly-6C (Gr-1) antibody (RB6-8C5)                    | BioLegend                  | Cat# 108408   | FCM         | 1/100                    |
| Brilliant Violet 605 anti-mouse CD45 antibody (30-F11)                 | BioLegend                  | Cat# 103140   | FCM         | 1/100                    |
| PE anti-mouse CD3 antibody (17A2)                                      | BioLegend                  | Cat# 100206   | FCM         | 1/100                    |
| Brilliant Violet anti-mouse CD8a antibody (53-6.7)                     | BioLegend                  | Cat# 100738   | FCM         | 1/100                    |
| PE/Cyanine5 anti-mouse CD4 antibody (GK1.5)                            | BioLegend                  | Cat# 100410   | FCM         | 1/100                    |
| FITC anti-mouse IFN-γ antibody (XMG1.2)                                | BioLegend                  | Cat# 505806   | FCM         | 1/100                    |
| Brilliant Violet 711 anti-mouse TNF-α (MP6-XT22)                       | BioLegend                  | Cat# 506349   | FCM         | 1/100                    |
