# Supplementary material for: Roseburia intestinalis generated butyrate boosts anti-PD-1 efficacy in colorectal cancer by activating cytotoxic CD8+ T cells
Source: PubMed Central journal article supplement — Gut. 2023 Jul 25;72(11):2112–22. doi: 10.1136/gutjnl-2023-330291 (PMC10579466; doi:10.1136/gutjnl-2023-330291), 2023-07-25
Supplement: gutjnl-2023-330291supp017.pdf [file gutjnl-2023-330291supp017.pdf]

**S Table 2. Patient information retrieved from our in-house cohort.**

| Sample        | Cohort   | Stage | Country | Continent | Age | Gender | AJCC | AJCC_simple | Labeling   |
|---------------|----------|-------|---------|-----------|-----|--------|------|-------------|------------|
| S3_043        | YuJ_2021 | CRC   | CHN     | Asian     | 72  | F      | I    | I           | Downstream |
| S5_002        | YuJ_2021 | CRC   | CHN     | Asian     | 50  | M      | I    | I           | Downstream |
| S5_003        | YuJ_2021 | CRC   | CHN     | Asian     | 83  | M      | II   | II          | Downstream |
| S5_006        | YuJ_2021 | CRC   | CHN     | Asian     | 75  | M      | I    | I           | Downstream |
| S5_007        | YuJ_2021 | CRC   | CHN     | Asian     | 58  | F      | III  | III         | Downstream |
| S5_008        | YuJ_2021 | CRC   | CHN     | Asian     | 67  | M      | IV   | IV          | Downstream |
| S5_009        | YuJ_2021 | CRC   | CHN     | Asian     | 89  | F      | II   | II          | Downstream |
| S5_010        | YuJ_2021 | CRC   | CHN     | Asian     | 82  | F      | II   | II          | Discard    |
| S5_011        | YuJ_2021 | CRC   | CHN     | Asian     | 71  | M      | II   | II          | Downstream |
| S5_012_merged | YuJ_2021 | CRC   | CHN     | Asian     | 84  | M      | III  | III         | Downstream |
| S5_013        | YuJ_2021 | CRC   | CHN     | Asian     | 72  | F      | II   | II          | Downstream |
| S5_014        | YuJ_2021 | CRC   | CHN     | Asian     | 61  | M      | I    | I           | Discard    |
| S5_015        | YuJ_2021 | CRC   | CHN     | Asian     | 65  | M      | IV   | IV          | Downstream |
| S5_016        | YuJ_2021 | CRC   | CHN     | Asian     | 83  | M      | II   | II          | Downstream |
| S5_017        | YuJ_2021 | CRC   | CHN     | Asian     | 81  | M      | III  | III         | Downstream |
| S5_018        | YuJ_2021 | CRC   | CHN     | Asian     | 74  | M      | III  | III         | Downstream |
| S5_019        | YuJ_2021 | CRC   | CHN     | Asian     | 65  | F      | IV   | IV          | Downstream |
| S5_020        | YuJ_2021 | CRC   | CHN     | Asian     | 72  | F      | I    | I           | Downstream |
| S5_021        | YuJ_2021 | CRC   | CHN     | Asian     | 64  | F      | I    | I           | Downstream |
| S5_022        | YuJ_2021 | CRC   | CHN     | Asian     | 73  | M      | I    | I           | Downstream |
| S5_023        | YuJ_2021 | CRC   | CHN     | Asian     | 68  | F      | III  | III         | Downstream |
| S5_025        | YuJ_2021 | CRC   | CHN     | Asian     | 60  | F      | III  | III         | Downstream |
| S5_026        | YuJ_2021 | CRC   | CHN     | Asian     | 80  | F      | I    | I           | Downstream |
| S5_027        | YuJ_2021 | CRC   | CHN     | Asian     | 84  | F      | III  | III         | Discard    |
| S5_028        | YuJ_2021 | CRC   | CHN     | Asian     | 67  | M      | I    | I           | Downstream |
| S5_029        | YuJ_2021 | CRC   | CHN     | Asian     | 79  | M      | III  | III         | Downstream |
| S5_030        | YuJ_2021 | CRC   | CHN     | Asian     | 82  | M      | IV   | IV          | Downstream |
| S5_031        | YuJ_2021 | CRC   | CHN     | Asian     | 84  | M      | III  | III         | Downstream |
| S5_032        | YuJ_2021 | CRC   | CHN     | Asian     | 85  | M      | II   | II          | Downstream |
| S5_034        | YuJ_2021 | CRC   | CHN     | Asian     | 74  | F      | IV   | IV          | Downstream |
| S5_035        | YuJ_2021 | CRC   | CHN     | Asian     | 77  | M      | II   | II          | Downstream |
| S5_037        | YuJ_2021 | CRC   | CHN     | Asian     | 73  | F      | III  | III         | Downstream |
| S5_038        | YuJ_2021 | CRC   | CHN     | Asian     | 67  | M      | II   | II          | Downstream |
| S5_039        | YuJ_2021 | CRC   | CHN     | Asian     | 70  | F      | II   | II          | Downstream |
| S5_040        | YuJ_2021 | CRC   | CHN     | Asian     | 91  | M      | II   | II          | Downstream |
| S5_041        | YuJ_2021 | CRC   | CHN     | Asian     | 64  | F      | III  | III         | Discard    |
| S5_042        | YuJ_2021 | CRC   | CHN     | Asian     | 77  | M      | II   | II          | Downstream |
| S5_043        | YuJ_2021 | CRC   | CHN     | Asian     | 63  | F      | II   | II          | Discard    |
| S5_045        | YuJ_2021 | CRC   | CHN     | Asian     | 80  | M      | III  | III         | Downstream |
| S5_047        | YuJ_2021 | CRC   | CHN     | Asian     | 43  | F      | IV   | IV          | Downstream |
| S5_052        | YuJ_2021 | CRC   | CHN     | Asian     | 84  | F      | II   | II          | Downstream |
| S5_055        | YuJ_2021 | CRC   | CHN     | Asian     | 81  | F      | I    | I           | Downstream |
| S5_055-2      | YuJ_2021 | CRC   | CHN     | Asian     | 81  | F      | I    | I           | Discard    |
| S5_056        | YuJ_2021 | CRC   | CHN     | Asian     | 79  | M      | IV   | IV          | Downstream |
| S5_057        | YuJ_2021 | CRC   | CHN     | Asian     | 92  | M      | III  | III         | Downstream |
| S5_060        | YuJ_2021 | CRC   | CHN     | Asian     | 52  | F      | I    | I           | Downstream |
| S5_061        | YuJ_2021 | CRC   | CHN     | Asian     | 84  | M      | III  | III         | Downstream |
| S5_062        | YuJ_2021 | CRC   | CHN     | Asian     | 96  | F      | II   | II          | Downstream |
| S5_064        | YuJ_2021 | CRC   | CHN     | Asian     | 78  | M      | I    | I           | Downstream |
| S5_066        | YuJ_2021 | CRC   | CHN     | Asian     | 58  | F      | IV   | IV          | Discard    |
| S5_068        | YuJ_2021 | CRC   | CHN     | Asian     | 87  | F      | III  | III         | Downstream |
| S5_070        | YuJ_2021 | CRC   | CHN     | Asian     | 59  | M      | III  | III         | Downstream |
| S5_071        | YuJ_2021 | CRC   | CHN     | Asian     | 83  | M      | II   | II          | Downstream |
| S5_072        | YuJ_2021 | CRC   | CHN     | Asian     | 71  | M      | III  | III         | Downstream |
| S5_073        | YuJ_2021 | CRC   | CHN     | Asian     | 85  | M      | II   | II          | Downstream |
| S5_075        | YuJ_2021 | CRC   | CHN     | Asian     | 81  | M      | III  | III         | Discard    |
| S5_076        | YuJ_2021 | CRC   | CHN     | Asian     | 82  | F      | II   | II          | Discard    |
| S5_077        | YuJ_2021 | CRC   | CHN     | Asian     | 54  | F      | IV   | IV          | Downstream |
| S5_078        | YuJ_2021 | CRC   | CHN     | Asian     | 74  | F      | II   | II          | Downstream |
| S5_080        | YuJ_2021 | CRC   | CHN     | Asian     | 83  | F      | IV   | IV          | Discard    |
| S5_082        | YuJ_2021 | CRC   | CHN     | Asian     | 86  | F      | III  | III         | Downstream |
| S5_083        | YuJ_2021 | CRC   | CHN     | Asian     | 69  | F      | II   | II          | Downstream |
| S5_084_merged | YuJ_2021 | CRC   | CHN     | Asian     | 68  | F      | III  | III         | Downstream |
| S5_085        | YuJ_2021 | CRC   | CHN     | Asian     | 74  | M      | I    | I           | Downstream |
| S5_086        | YuJ_2021 | CRC   | CHN     | Asian     | 67  | M      | I    | I           | Downstream |

|               |          |      |     |       |    |   |     |     |            |
|---------------|----------|------|-----|-------|----|---|-----|-----|------------|
| S5_087        | YuJ_2021 | CRC  | CHN | Asian | 81 | M | II  | II  | Discard    |
| S5_088        | YuJ_2021 | CRC  | CHN | Asian | 56 | M | I   | I   | Downstream |
| S5_089        | YuJ_2021 | CRC  | CHN | Asian | 75 | M | I   | I   | Downstream |
| S5_091        | YuJ_2021 | CRC  | CHN | Asian | 74 | M | III | III | Downstream |
| S5_092        | YuJ_2021 | CRC  | CHN | Asian | 61 | F | III | III | Downstream |
| S5_093        | YuJ_2021 | CRC  | CHN | Asian | 60 | M | III | III | Downstream |
| S5_094_merged | YuJ_2021 | CRC  | CHN | Asian | 77 | M | II  | II  | Downstream |
| S5_096        | YuJ_2021 | CRC  | CHN | Asian | 70 | M | II  | II  | Downstream |
| S5_098        | YuJ_2021 | CRC  | CHN | Asian | 64 | F | III | III | Downstream |
| S5_099        | YuJ_2021 | CRC  | CHN | Asian | 55 | M | II  | II  | Downstream |
| S5_101        | YuJ_2021 | CRC  | CHN | Asian | 89 | M | II  | II  | Downstream |
| S5_104        | YuJ_2021 | CRC  | CHN | Asian | 78 | M | IV  | IV  | Downstream |
| S6_001        | YuJ_2021 | CRC  | CHN | Asian | 65 | F | I   | I   | Downstream |
| S6_002        | YuJ_2021 | CRC  | CHN | Asian | 83 | M | II  | II  | Downstream |
| S6_003_merged | YuJ_2021 | CRC  | CHN | Asian | 87 | F | III | III | Downstream |
| S6_004        | YuJ_2021 | CRC  | CHN | Asian | 75 | M | I   | I   | Downstream |
| S6_005        | YuJ_2021 | CRC  | CHN | Asian | 67 | M | IV  | IV  | Downstream |
| S6_006        | YuJ_2021 | CRC  | CHN | Asian | 89 | F | II  | II  | Downstream |
| S6_007        | YuJ_2021 | CRC  | CHN | Asian | 82 | F | II  | II  | Downstream |
| S6_008        | YuJ_2021 | CRC  | CHN | Asian | 71 | M | II  | II  | Downstream |
| S6_009        | YuJ_2021 | CRC  | CHN | Asian | 84 | M | III | III | Downstream |
| S6_010        | YuJ_2021 | CRC  | CHN | Asian | 72 | F | II  | II  | Downstream |
| S6_011        | YuJ_2021 | CRC  | CHN | Asian | 65 | M | IV  | IV  | Discard    |
| S6_012        | YuJ_2021 | CRC  | CHN | Asian | 60 | F | III | III | Downstream |
| S6_013        | YuJ_2021 | CRC  | CHN | Asian | 64 | F | I   | I   | Discard    |
| S6_014        | YuJ_2021 | CRC  | CHN | Asian | 78 | M | IV  | IV  | Downstream |
| S6_015        | YuJ_2021 | CRC  | CHN | Asian | 74 | M | III | III | Downstream |
| S6_016        | YuJ_2021 | CRC  | CHN | Asian | 83 | M | II  | II  | Downstream |
| S6_017        | YuJ_2021 | CRC  | CHN | Asian | 62 | M | II  | II  | Downstream |
| S6_018        | YuJ_2021 | CRC  | CHN | Asian | 81 | M | III | III | Downstream |
| S6_019        | YuJ_2021 | CRC  | CHN | Asian | 80 | M | III | III | Downstream |
| S6_020        | YuJ_2021 | CRC  | CHN | Asian | 86 | F | II  | II  | Downstream |
| S6_021        | YuJ_2021 | CRC  | CHN | Asian | 83 | F | IV  | IV  | Downstream |
| S6_022        | YuJ_2021 | CRC  | CHN | Asian | 64 | F | III | III | Downstream |
| S6_023        | YuJ_2021 | CRC  | CHN | Asian | 73 | M | I   | I   | Downstream |
| S6_024        | YuJ_2021 | CRC  | CHN | Asian | 89 | M | II  | II  | Downstream |
| S6_025        | YuJ_2021 | CRC  | CHN | Asian | 81 | F | I   | I   | Downstream |
| S6_026        | YuJ_2021 | CRC  | CHN | Asian | 67 | M | I   | I   | Discard    |
| S6_027        | YuJ_2021 | CRC  | CHN | Asian | 62 | M | II  | II  | Downstream |
| S6_028        | YuJ_2021 | CRC  | CHN | Asian | 69 | F | II  | II  | Downstream |
| S6_029        | YuJ_2021 | CRC  | CHN | Asian | 68 | F | III | III | Downstream |
| S6_030        | YuJ_2021 | CRC  | CHN | Asian | 57 | F | IV  | IV  | Downstream |
| S6_031        | YuJ_2021 | CRC  | CHN | Asian | 72 | F | I   | I   | Downstream |
| S6_032        | YuJ_2021 | CRC  | CHN | Asian | 68 | F | III | III | Downstream |
| S6_035        | YuJ_2021 | CRC  | CHN | Asian | 64 | F | III | III | Downstream |
| S1_001        | YuJ_2021 | Ctrl | CHN | Asian | 54 | F | NA  | NA  | Downstream |
| S1_002        | YuJ_2021 | Ctrl | CHN | Asian | 57 | F | NA  | NA  | Downstream |
| S1_003        | YuJ_2021 | Ctrl | CHN | Asian | 63 | M | NA  | NA  | Downstream |
| S1_004        | YuJ_2021 | Ctrl | CHN | Asian | 59 | F | NA  | NA  | Downstream |
| S1_005        | YuJ_2021 | Ctrl | CHN | Asian | 62 | F | NA  | NA  | Discard    |
| S1_006        | YuJ_2021 | Ctrl | CHN | Asian | 68 | M | NA  | NA  | Downstream |
| S1_007        | YuJ_2021 | Ctrl | CHN | Asian | 63 | M | NA  | NA  | Downstream |
| S1_008        | YuJ_2021 | Ctrl | CHN | Asian | 73 | F | NA  | NA  | Downstream |
| S1_009        | YuJ_2021 | Ctrl | CHN | Asian | 71 | M | NA  | NA  | Downstream |
| S1_010        | YuJ_2021 | Ctrl | CHN | Asian | 57 | F | NA  | NA  | Discard    |
| S1_011        | YuJ_2021 | Ctrl | CHN | Asian | 61 | F | NA  | NA  | Downstream |
| S1_012_merged | YuJ_2021 | Ctrl | CHN | Asian | 59 | F | NA  | NA  | Downstream |
| S1_013        | YuJ_2021 | Ctrl | CHN | Asian | 65 | M | NA  | NA  | Downstream |
| S1_014        | YuJ_2021 | Ctrl | CHN | Asian | 60 | F | NA  | NA  | Discard    |
| S1_015        | YuJ_2021 | Ctrl | CHN | Asian | 71 | F | NA  | NA  | Downstream |
| S1_016        | YuJ_2021 | Ctrl | CHN | Asian | 65 | F | NA  | NA  | Downstream |
| S1_017        | YuJ_2021 | Ctrl | CHN | Asian | 71 | F | NA  | NA  | Downstream |
| S1_018        | YuJ_2021 | Ctrl | CHN | Asian | 65 | M | NA  | NA  | Discard    |
| S1_019        | YuJ_2021 | Ctrl | CHN | Asian | 66 | M | NA  | NA  | Downstream |
| S1_020        | YuJ_2021 | Ctrl | CHN | Asian | 79 | F | NA  | NA  | Downstream |
| S1_021        | YuJ_2021 | Ctrl | CHN | Asian | 71 | M | NA  | NA  | Downstream |
| S1_022        | YuJ_2021 | Ctrl | CHN | Asian | 57 | M | NA  | NA  | Downstream |

|               |          |      |     |       |    |   |    |    |            |
|---------------|----------|------|-----|-------|----|---|----|----|------------|
| S1_023        | YuJ_2021 | Ctrl | CHN | Asian | 64 | M | NA | NA | Downstream |
| S1_024_merged | YuJ_2021 | Ctrl | CHN | Asian | 65 | M | NA | NA | Downstream |
| S1_025        | YuJ_2021 | Ctrl | CHN | Asian | 58 | M | NA | NA | Downstream |
| S1_026        | YuJ_2021 | Ctrl | CHN | Asian | 59 | M | NA | NA | Downstream |
| S1_027        | YuJ_2021 | Ctrl | CHN | Asian | 67 | M | NA | NA | Downstream |
| S1_028        | YuJ_2021 | Ctrl | CHN | Asian | 50 | M | NA | NA | Discard    |
| S1_029        | YuJ_2021 | Ctrl | CHN | Asian | 61 | F | NA | NA | Downstream |
| S1_030        | YuJ_2021 | Ctrl | CHN | Asian | 47 | F | NA | NA | Downstream |
| S1_031        | YuJ_2021 | Ctrl | CHN | Asian | 52 | F | NA | NA | Downstream |
| S1_032        | YuJ_2021 | Ctrl | CHN | Asian | 51 | M | NA | NA | Downstream |
| S1_033        | YuJ_2021 | Ctrl | CHN | Asian | 63 | F | NA | NA | Downstream |
| S1_034        | YuJ_2021 | Ctrl | CHN | Asian | 68 | F | NA | NA | Downstream |
| S1_035        | YuJ_2021 | Ctrl | CHN | Asian | 55 | M | NA | NA | Downstream |
| S1_036        | YuJ_2021 | Ctrl | CHN | Asian | 62 | F | NA | NA | Downstream |
| S1_037        | YuJ_2021 | Ctrl | CHN | Asian | 64 | M | NA | NA | Downstream |
| S1_038        | YuJ_2021 | Ctrl | CHN | Asian | 59 | M | NA | NA | Downstream |
| S1_039        | YuJ_2021 | Ctrl | CHN | Asian | 54 | F | NA | NA | Downstream |
| S1_040        | YuJ_2021 | Ctrl | CHN | Asian | 60 | F | NA | NA | Discard    |
| S1_041        | YuJ_2021 | Ctrl | CHN | Asian | 56 | M | NA | NA | Downstream |
| S1_042        | YuJ_2021 | Ctrl | CHN | Asian | 62 | F | NA | NA | Downstream |
| S1_043        | YuJ_2021 | Ctrl | CHN | Asian | 75 | M | NA | NA | Discard    |
| S1_045        | YuJ_2021 | Ctrl | CHN | Asian | 67 | F | NA | NA | Discard    |
| S1_047        | YuJ_2021 | Ctrl | CHN | Asian | 66 | M | NA | NA | Downstream |
| S1_048        | YuJ_2021 | Ctrl | CHN | Asian | 57 | F | NA | NA | Downstream |
| S1_049        | YuJ_2021 | Ctrl | CHN | Asian | 61 | F | NA | NA | Downstream |
| S1_050        | YuJ_2021 | Ctrl | CHN | Asian | 70 | F | NA | NA | Downstream |
| S1_051        | YuJ_2021 | Ctrl | CHN | Asian | 62 | F | NA | NA | Downstream |
| S1_052        | YuJ_2021 | Ctrl | CHN | Asian | 61 | F | NA | NA | Downstream |
| S1_053        | YuJ_2021 | Ctrl | CHN | Asian | 64 | F | NA | NA | Downstream |
| S1_054        | YuJ_2021 | Ctrl | CHN | Asian | 62 | F | NA | NA | Downstream |
| S1_057        | YuJ_2021 | Ctrl | CHN | Asian | 57 | F | NA | NA | Downstream |
| S1_058        | YuJ_2021 | Ctrl | CHN | Asian | 60 | M | NA | NA | Downstream |
| S1_060_merged | YuJ_2021 | Ctrl | CHN | Asian | 57 | F | NA | NA | Downstream |
| S1_061        | YuJ_2021 | Ctrl | CHN | Asian | 59 | F | NA | NA | Downstream |
| S1_062_merged | YuJ_2021 | Ctrl | CHN | Asian | 61 | F | NA | NA | Downstream |
| S1_064        | YuJ_2021 | Ctrl | CHN | Asian | 72 | M | NA | NA | Downstream |
| S1_065        | YuJ_2021 | Ctrl | CHN | Asian | 64 | F | NA | NA | Downstream |
| S1_066        | YuJ_2021 | Ctrl | CHN | Asian | 64 | M | NA | NA | Downstream |
| S1_067        | YuJ_2021 | Ctrl | CHN | Asian | 57 | F | NA | NA | Discard    |
| S1_068        | YuJ_2021 | Ctrl | CHN | Asian | 62 | F | NA | NA | Downstream |
| S1_069        | YuJ_2021 | Ctrl | CHN | Asian | 65 | F | NA | NA | Downstream |
| S1_070        | YuJ_2021 | Ctrl | CHN | Asian | 58 | M | NA | NA | Downstream |
| S1_071        | YuJ_2021 | Ctrl | CHN | Asian | 65 | F | NA | NA | Downstream |
| S1_072        | YuJ_2021 | Ctrl | CHN | Asian | 76 | F | NA | NA | Downstream |
| S1_073        | YuJ_2021 | Ctrl | CHN | Asian | 65 | F | NA | NA | Downstream |
| S1_074        | YuJ_2021 | Ctrl | CHN | Asian | 63 | F | NA | NA | Downstream |
| S1_077        | YuJ_2021 | Ctrl | CHN | Asian | 67 | F | NA | NA | Downstream |
| S1_078        | YuJ_2021 | Ctrl | CHN | Asian | 68 | F | NA | NA | Discard    |
| S1_079        | YuJ_2021 | Ctrl | CHN | Asian | 65 | M | NA | NA | Downstream |
| S1_081        | YuJ_2021 | Ctrl | CHN | Asian | 67 | F | NA | NA | Downstream |
| S1_083        | YuJ_2021 | Ctrl | CHN | Asian | 72 | F | NA | NA | Downstream |
| S1_084        | YuJ_2021 | Ctrl | CHN | Asian | 59 | M | NA | NA | Downstream |
| S1_086        | YuJ_2021 | Ctrl | CHN | Asian | 57 | M | NA | NA | Downstream |
| S1_087        | YuJ_2021 | Ctrl | CHN | Asian | 62 | F | NA | NA | Discard    |
| S1_088        | YuJ_2021 | Ctrl | CHN | Asian | 65 | F | NA | NA | Downstream |
| S1_089        | YuJ_2021 | Ctrl | CHN | Asian | 62 | F | NA | NA | Downstream |
| S1_089-2      | YuJ_2021 | Ctrl | CHN | Asian | 62 | F | NA | NA | Downstream |
| S1_091        | YuJ_2021 | Ctrl | CHN | Asian | 57 | M | NA | NA | Downstream |
| S1_092        | YuJ_2021 | Ctrl | CHN | Asian | 62 | M | NA | NA | Downstream |
| S1_093        | YuJ_2021 | Ctrl | CHN | Asian | 67 | M | NA | NA | Downstream |
| S1_094        | YuJ_2021 | Ctrl | CHN | Asian | 60 | F | NA | NA | Downstream |
| S1_095        | YuJ_2021 | Ctrl | CHN | Asian | 59 | F | NA | NA | Downstream |
| S1_100_merged | YuJ_2021 | Ctrl | CHN | Asian | 53 | F | NA | NA | Downstream |
| S1_102        | YuJ_2021 | Ctrl | CHN | Asian | 52 | F | NA | NA | Downstream |
| S1_105        | YuJ_2021 | Ctrl | CHN | Asian | 61 | F | NA | NA | Downstream |
| S1_106        | YuJ_2021 | Ctrl | CHN | Asian | 59 | M | NA | NA | Downstream |
| S1_107        | YuJ_2021 | Ctrl | CHN | Asian | 72 | F | NA | NA | Downstream |

|        |          |      |     |       |    |   |    |    |            |
|--------|----------|------|-----|-------|----|---|----|----|------------|
| S1_108 | YuJ_2021 | Ctrl | CHN | Asian | 63 | M | NA | NA | Downstream |
| S1_109 | YuJ_2021 | Ctrl | CHN | Asian | 51 | M | NA | NA | Downstream |
| S1_110 | YuJ_2021 | Ctrl | CHN | Asian | 53 | F | NA | NA | Downstream |
| S1_111 | YuJ_2021 | Ctrl | CHN | Asian | 72 | M | NA | NA | Downstream |
| S1_112 | YuJ_2021 | Ctrl | CHN | Asian | 57 | M | NA | NA | Downstream |
| S1_113 | YuJ_2021 | Ctrl | CHN | Asian | 56 | F | NA | NA | Downstream |
| S1_114 | YuJ_2021 | Ctrl | CHN | Asian | 59 | M | NA | NA | Downstream |
| S1_115 | YuJ_2021 | Ctrl | CHN | Asian | 57 | F | NA | NA | Downstream |
| S1_116 | YuJ_2021 | Ctrl | CHN | Asian | 54 | F | NA | NA | Downstream |
| S1_118 | YuJ_2021 | Ctrl | CHN | Asian | 48 | F | NA | NA | Downstream |
| S1_120 | YuJ_2021 | Ctrl | CHN | Asian | 58 | F | NA | NA | Downstream |
| S1_121 | YuJ_2021 | Ctrl | CHN | Asian | 76 | M | NA | NA | Downstream |
| S1_122 | YuJ_2021 | Ctrl | CHN | Asian | 78 | F | NA | NA | Discard    |
| S1_123 | YuJ_2021 | Ctrl | CHN | Asian | 72 | M | NA | NA | Downstream |
| S1_124 | YuJ_2021 | Ctrl | CHN | Asian | 76 | F | NA | NA | Downstream |
| S1_125 | YuJ_2021 | Ctrl | CHN | Asian | 58 | M | NA | NA | Downstream |
| S1_126 | YuJ_2021 | Ctrl | CHN | Asian | 58 | M | NA | NA | Downstream |
| S1_127 | YuJ_2021 | Ctrl | CHN | Asian | 63 | F | NA | NA | Downstream |
| S1_128 | YuJ_2021 | Ctrl | CHN | Asian | 69 | F | NA | NA | Downstream |
| S1_130 | YuJ_2021 | Ctrl | CHN | Asian | 67 | M | NA | NA | Downstream |
| S1_132 | YuJ_2021 | Ctrl | CHN | Asian | 65 | F | NA | NA | Downstream |
| S2_005 | YuJ_2021 | Ctrl | CHN | Asian | 60 | F | NA | NA | Downstream |
| S3_096 | YuJ_2021 | Ctrl | CHN | Asian | 66 | M | NA | NA | Downstream |
