# Supplementary figures and images for: Roseburia intestinalis generated butyrate boosts anti-PD-1 efficacy in colorectal cancer by activating cytotoxic CD8+ T cells
Source: PubMed Central journal article supplement — Gut. 2023 Jul 25;72(11):2112–22. doi: 10.1136/gutjnl-2023-330291 (PMC10579466; doi:10.1136/gutjnl-2023-330291), 2023-07-25

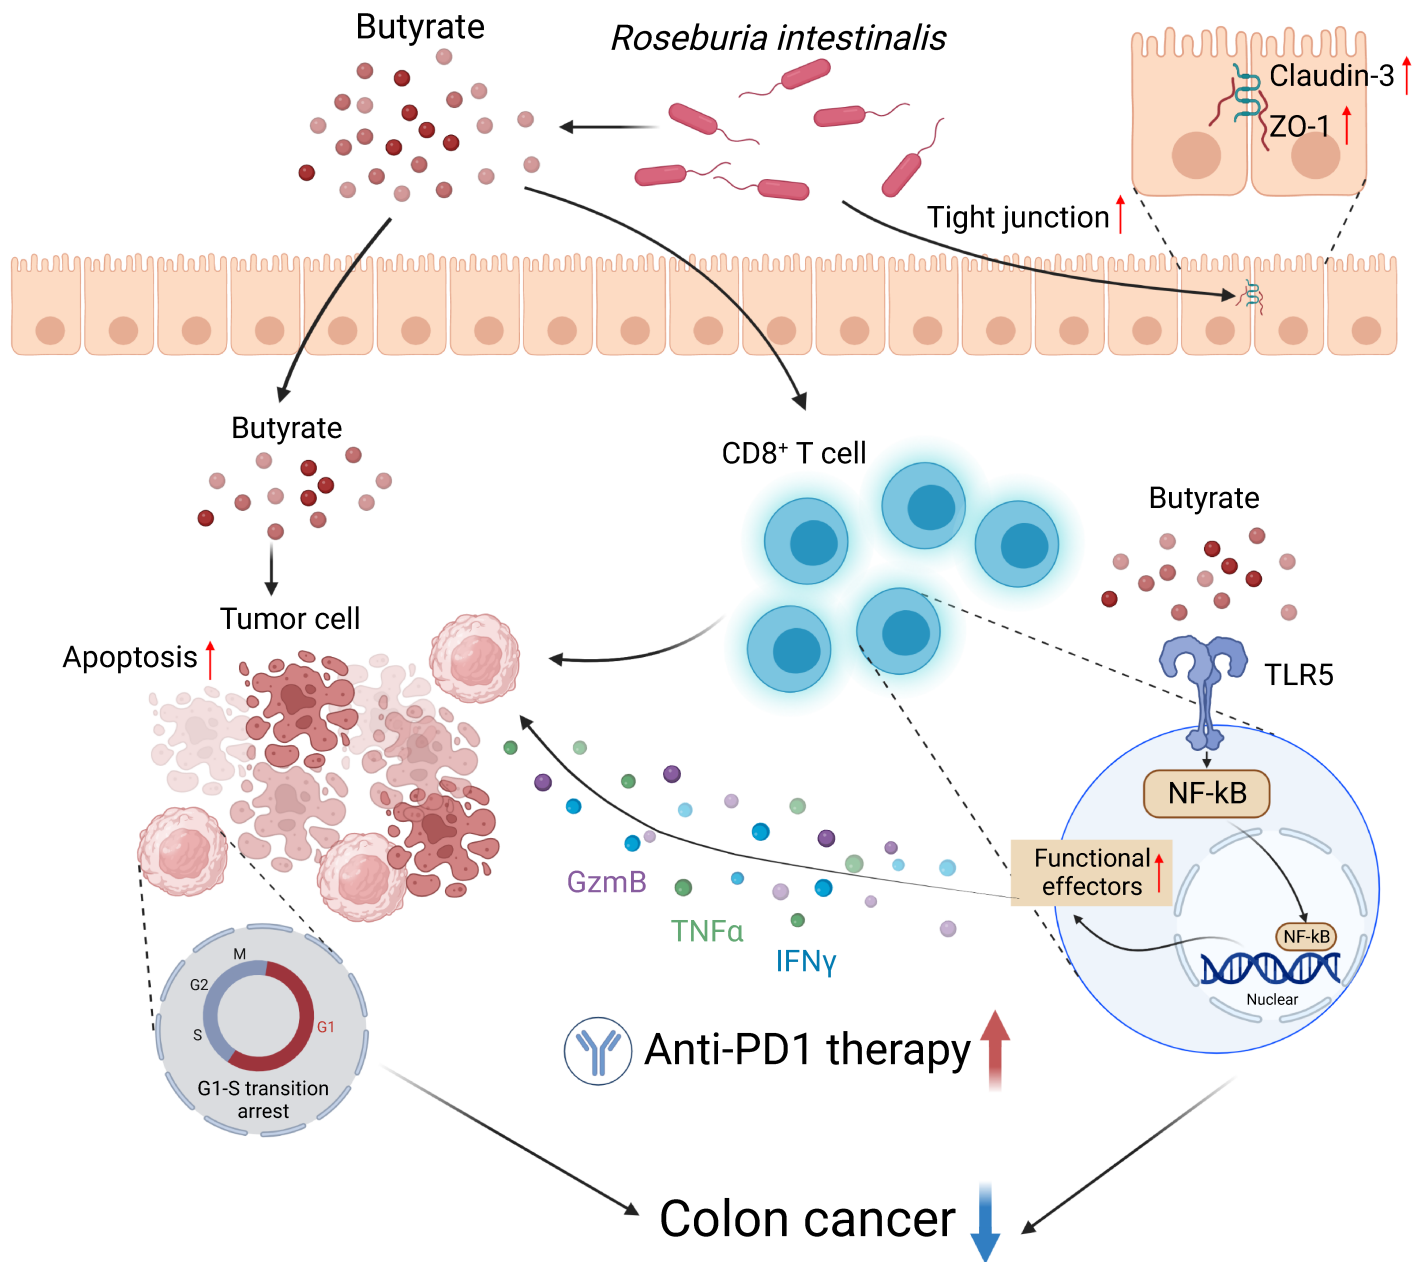

Supplement: gutjnl-2023-330291supp002.pdf [file gutjnl-2023-330291supp002.pdf]

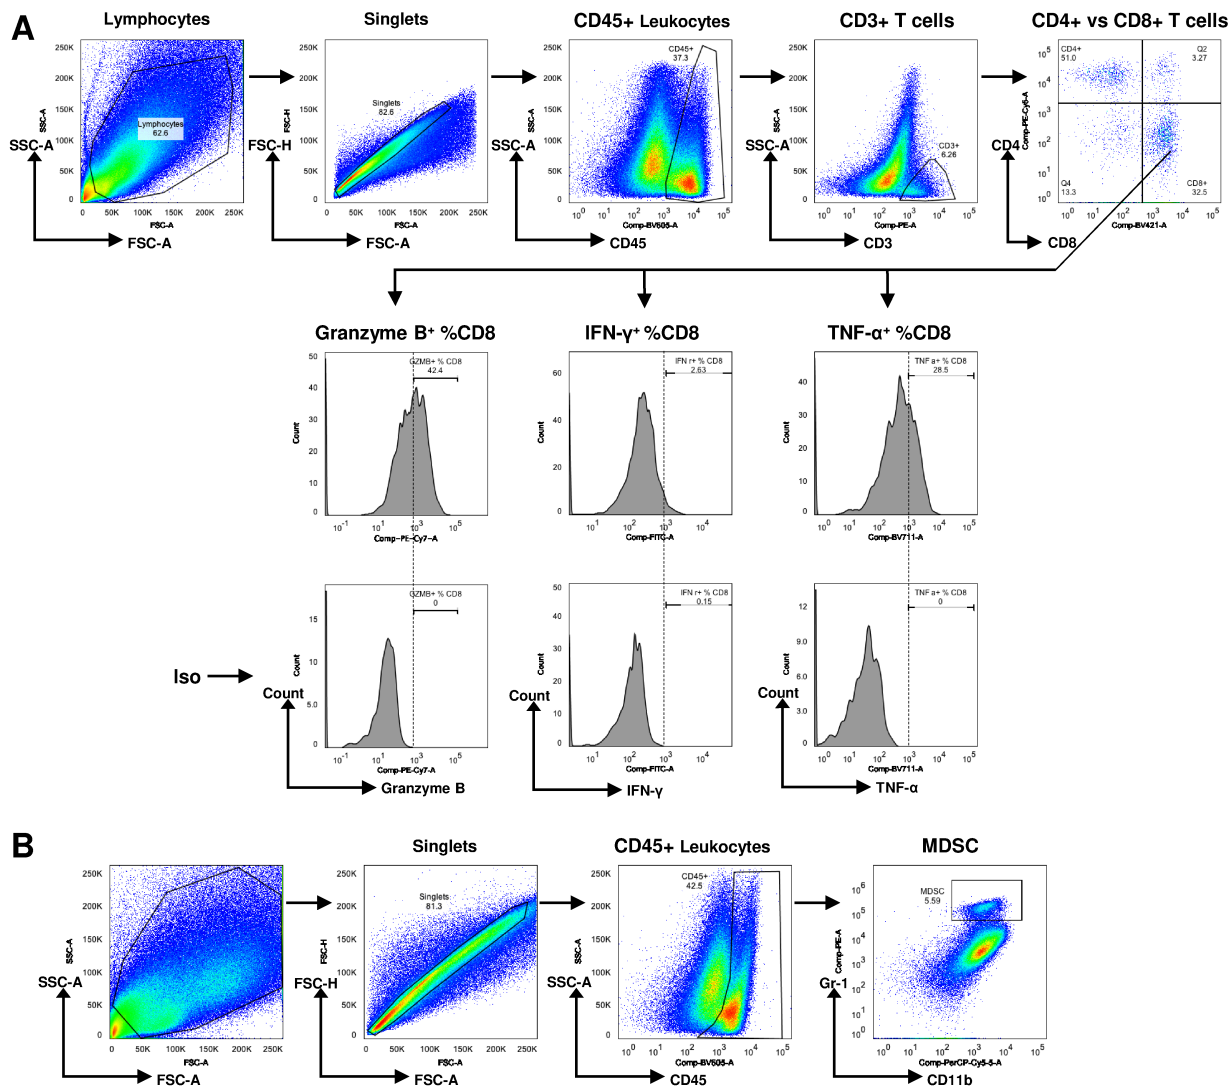

Supplementary Figure 1. Gating strategy of cytotoxic T cells (A) and MDSC (B).

Supplement: gutjnl-2023-330291supp003.pdf [file gutjnl-2023-330291supp003.pdf]
